# Supplementary material
Source: Research Square preprint supplement (doi:10.21203/rs.3.rs-9261345/v1)
Supplement: Supplementary file 2 [file a757b2ae0e1e8d9d0577429b.docx]

Table 2. Cost-Effectiveness Results for Non-Dominated Alternatives

Description: Incremental cost-effectiveness ratios (ICER) for non-dominated strategies.

Abbreviations: ICER = Incremental Cost-Effectiveness Ratio; QALY = Quality-Adjusted Life Year

| Strategy | Cost (U$) | Incr Cost (U$) | QALYs | Incr QALYs | ICER |
| --- | --- | --- | --- | --- | --- |
| Crizotinib + Chemotherapy | 171.809,12 |  | 2,63 |  |  |
| Brigatinib + Chemotherapy | 184.507,28 | 12.698,16 | 3,00 | 0,37 | 34.244,90 |
| Alectinib + Chemotherapy | 304.001,61 | 119.494,33 | 3,76 | 0,75 | 159.034,41 |
| Alectinib + Lorlatinib | 406.197,97 | 102.196,37 | 3,95 | 0,19 | 527.442,75 |
