# Supplementary material
Source: Research Square preprint supplement (doi:10.21203/rs.3.rs-9261345/v1)
Supplement: Supplementary file 3 [file ad09bea2f918242e4aabe292.docx]

Table 1. Model Parameters and Inputs

Description: Parameters used in the Markov model including costs, HR values, and utility scores.

Abbreviations: HR = Hazard Ratio; QALY = Quality-Adjusted Life Year.

| **Model input** | **Baseline values** | **Range** | **Sources** |
| --- | --- | --- | --- |
| **Utility (QALY)** | | | |
| Progression-free survival | 0,71 | 0,67-0,76 | Chouaid, 2013 (6) |
| 2nd line therapy progressed | 0,67 | 0,59 – 0,75 | Chouaid, 2013 (6) |
| 3rd line therapy progressed | 0,46 | 0,28 – 0,63 | Chouaid, 2013 (6) |
| **Overall Survival - First-Line Treatment vs. Crizotinib (HR)** | | | |
| Alectinib | 0,60 | (0,37 – 0,99) | Zhou, 2024 |
| Brigatinib | 0,81 | (0,53-1,22) | Camidge, 2021 |
| Lorlatinib | 0,72 | (0,41 – 1,26) | Cameron, 2022 |
| **Progression-Free Survival - First-Line Treatment vs. Crizotinib (HR)** | | | |
| Brigatinib | 0,48 | (0,35 – 0,66) | Camidge, 2021 |
| Alectinib | 0,33 | (0,23 – 0,49) | Zhou, 2024 |
| Lorlatinib | 0,19 | (0,13 – 0,27) | Solomon, 2024 |
| **Overall Survival - 2nd Line Treatment vs. Chemotherapy (HR)** | | | |
| Crizotinib*/ Alectinib | 0,2 |  | Khan et al, 2019 |
| **Progression-Free Survival - 2nd Line Treatment vs. Chemotherapy (HR)** | | | |
| Alectinib/Brigatinib**/ Lorlatinib** | 0,2 | (0,12 – 0,33) | Zhou, 2024 |
| **Cost (U$)** | | | |
| Follow-up per month | U$ 26,27 | ±20% | SIGTAP/DATASUS (17); Report 856 CONITEC (5) |
| Progression in 1st line | U$ 1.390,02 | ±20% | SIGTAP/DATASUS (17); Report 856 CONITEC (5) |
| Progression in 2nd line | U$ 2.115,04 | ±20% | SIGTAP/DATASUS (17); Report 856 CONITEC (5) |
| Chemotherapy per month (2nd line) | U$ 450,82 | ±20% | SIGTAP/DATASUS (17); Report 856 CONITEC (5) |
| Crizotinib per month | U$ 2.660,66 | ±20% | SIGTAP/DATASUS (17); Report 856 CONITEC (5) |
| Initial Brigatinib | U$ 2.637,59 | ±20% | Company proposal; Drug information leaflet |
| Brigatinib per month (maintenance) | U$ 2.985,95 | ±20% | Company proposal; Drug information leaflet |
| Alectinib per month | U$ 5.180,43 | ±20% | Company proposal; Drug information leaflet |
| Lorlatinib per month | U$ 6.577,38 | ±20% | Company proposal; Drug information leaflet |

*Results versus chemotherapy showed no statistically significant difference with any targeted therapy studied, and it was considered that the drugs would not present a difference in overall survival outcome.

**The Systematic Review revealed very similar HR values for progression-free survival among the drugs in second-line treatment, and therefore the values for Alectinib were chosen for all of them.

*Results versus chemotherapy showed no statistically significant difference with any targeted therapy studied, and it was considered that the drugs would not present a difference in overall survival outcome. **The Systematic Review revealed very similar HR values for progression-free survival among the drugs in second-line treatment, and therefore the values for Alectinib were chosen for all of them.
